# Supplementary material for: Japanese subgroup analysis of EV‐301: An open‐label, randomized phase 3 study to evaluate enfortumab vedotin versus chemotherapy in subjects with previously treated locally advanced or metastatic urothelial carcinoma
Source: PubMed Central journal article supplement (PMC9939146; doi:10.1002/cam4.5165), 2022-09-02
Supplement: CAM4-12-2761-s001.pdf [file CAM4-12-2761-s001.pdf]

## Supporting Information

### List of Investigators

| Country | Primary Investigator                                                                                                                                                                                                                                                                                                                                                   |
|---------|------------------------------------------------------------------------------------------------------------------------------------------------------------------------------------------------------------------------------------------------------------------------------------------------------------------------------------------------------------------------|
| JAPAN   | Abe, Takashige; Ebara, Shin; Fukasawa, Satoshi; Hashimoto, Yasuhiro; Inokuchi, Junichi; Kanayama, Hiroomi; Kawasaki, Yoshihide; Kitamura, Hiroshi; Kobayashi, Takashi; Kondo, Yukihiro; Masumori, Naoya; Mizuno, Ryuichi; Nishimura, Kazuo; Obara, Wataru; Sugimoto, Mikio; Takamoto, Atsushi; Tomita, Yoshihiko; Uemura, Hiroji; Yokomizo, Akira; Yoshimura, Kazuhiro |

Investigators are listed in alphabetical order by country and last name.

## Supplemental Table

**Table S1. Treatment-Related Adverse Events of Special Interest† in the Japanese Subgroup (Safety Population)**

| Event, n (%)                       | Enfortumab Vedotin (N=36) | Standard Chemotherapy (N=48) |
|------------------------------------|---------------------------|------------------------------|
| <b>Skin reactions‡</b>             | <b>21 (58.3)</b>          | <b>12 (25.0)</b>             |
| Rash                               | 20 (55.6)                 | 6 (12.5)                     |
| Severe cutaneous adverse reaction§ | 11 (30.6)                 | 7 (14.6)                     |
| <b>Peripheral neuropathy</b>       | <b>19 (52.8)</b>          | <b>16 (33.3)</b>             |
| Sensory events¶                    | 18 (50.0)                 | 16 (33.3)                    |
| Motor events                       | 1 (2.8)                   | 0                            |
| <b>Ocular disorders</b>            | <b>2 (5.6)</b>            | <b>2 (4.2)</b>               |
| Dry eye                            | 2 (5.6)                   | 1 (2.1)                      |
| Blurred vision                     | 0                         | 1 (2.1)                      |
| Corneal disorders                  | 0                         | 0                            |
| <b>Infusion-related reactions</b>  | <b>7 (19.4)</b>           | <b>3 (6.3)</b>               |
| Systemic events                    | 6 (16.7)                  | 3 (6.3)                      |
| Local events                       | 1 (2.8)                   | 0                            |
| Infusion site reactions            | 1 (2.8)                   | 0                            |
| Extravasation site reactions       | 1 (2.8)                   | 0                            |
| <b>Hyperglycemia</b>               | <b>2 (5.6)</b>            | <b>0</b>                     |

†Events represent listings by Preferred Term and may include Sponsor Specific Query/Customized Medical Queries (SSQ/CMQ) or Standard MedDRA Queries.

‡Indicates rash or severe cutaneous adverse reactions.

§Composite Standard MedDRA Query High Level Term of severe cutaneous adverse reactions including: stomatitis, drug eruption, conjunctivitis, dermatitis bullous, skin exfoliation, blister, erythema multiforme, exfoliative rash, fixed eruption, mouth ulceration, pemphigus, and toxic skin eruption.

¶Represents any peripheral neuropathy sensory events (SSQ/CMQ) including: peripheral sensory neuropathy, neuropathy peripheral, paresthesia, polyneuropathy, hypoesthesia, neurotoxicity, dysesthesia, gait disturbance, burning sensation, neuralgia, and sensory loss.
